# Supplementary material
Source: Springer Nature journal article supplement (https://www.springermedizin.de/resource/supplementary/13024_2012_326_MOESM2_ESM.pdf/9643746)

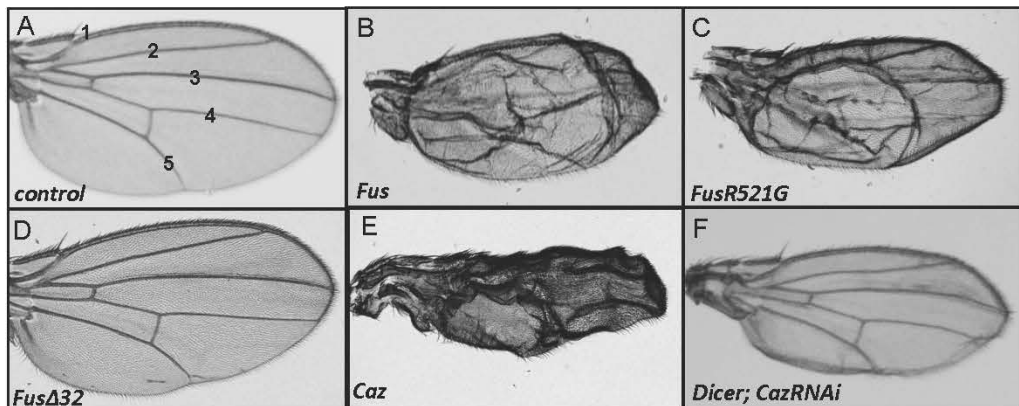

**G**  
% viability at 25°C

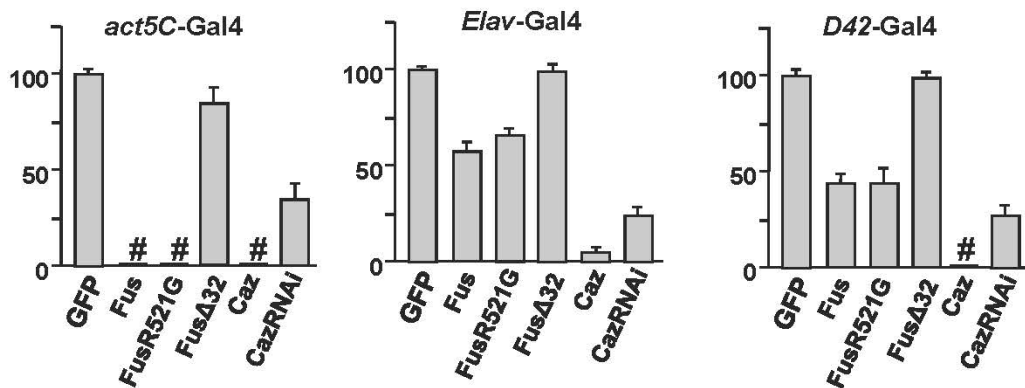

**H**  
% viability at 19°C

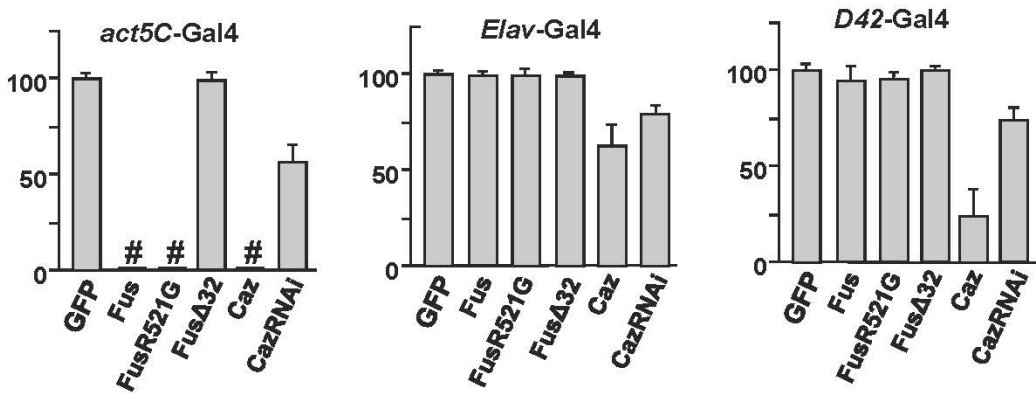

Supplement: MOESM2 [file 9643746]
